# Supplementary material for: Examination of photocatalytic Z-scheme system for overall water splitting with its electronic structure
Source: Royal Society of Chemistry journal article supplement (doi:10.1039/d3cp00241a), 2023-01-01
Supplement: d3cp00241a1.pdf [file d3cp00241a1.pdf]

## Supplementary Information

### Examination of photocatalytic Z-scheme system for overall water splitting with its electronic structure

*Tadaaki Tani,<sup>\*a</sup> Yuichi Yamaguchi,<sup>b</sup> Taisei Nishimi,<sup>c</sup> Takayuki Uchida,<sup>d</sup> Akihiko Kudo<sup>b</sup>*

<sup>a</sup> Fellow, The Society of Photography and Imaging of Japan, 2933-2 Yoshidajima,

Kaisei-machi, Ashigarakami-gun, Kanagawa-ken, 258-0021, Japan.

<sup>b</sup> Department of Applied Chemistry, Faculty of Science, Tokyo University of Science,

1-3, Kagurazaka, Shinjuku-ku, Tokyo, 162-8601, Japan.

<sup>c</sup> Japan Technological Research Association of Artificial Photosynthetic Chemical

Process (ARPCChem), Bld.12, Faculty of Engineering, University of Tokyo, 2-11-16,

Yayoi, Bunkyo-ku, Tokyo, 113-8656, Japan

<sup>d</sup> Graduate School of Engineering, Tokyo Polytechnic University, 1583 Atsugi,

Kanagawa, 243-0297, Japan.

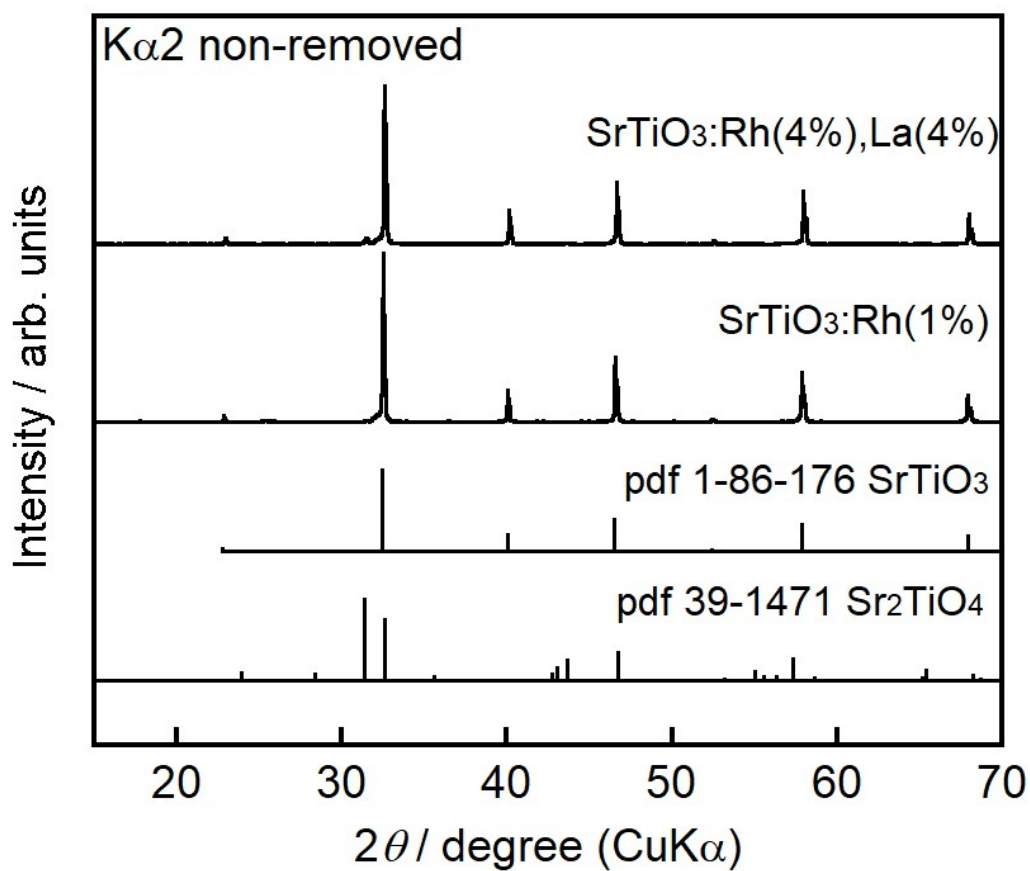

**Fig. S1** XRD patterns of Rh-doped and Rh,La-codoped SrTiO<sub>3</sub> particles. Peaks due to Kα<sub>2</sub> in the XRD patterns were not removed. Sr<sub>2</sub>TiO<sub>4</sub> as an impurity phase was observed for Rh,La-codoped SrTiO<sub>3</sub> possibly due to the fact that excess amount of SrCO<sub>3</sub> as a starting material was used for preparation.

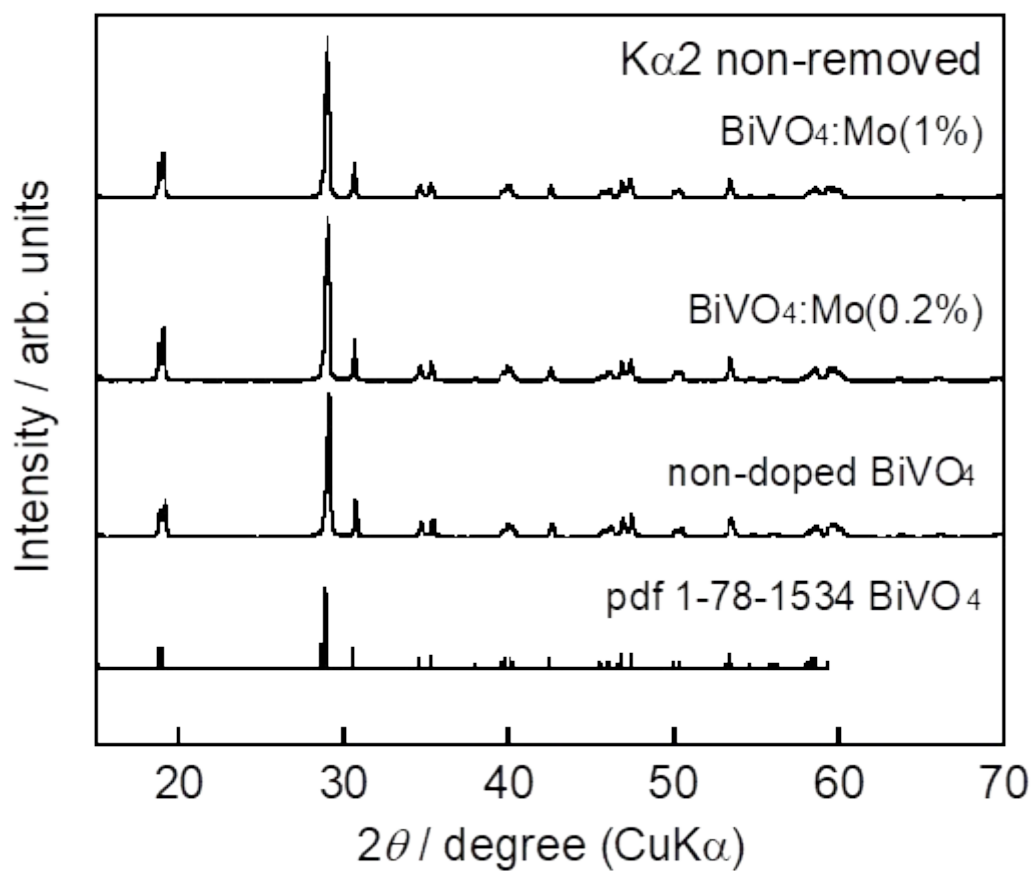

**Fig. S2** XRD patterns of non-doped and Mo-doped BiVO<sub>4</sub> particles. Peaks due to Kα<sub>2</sub> in the XRD patterns were not removed.
